# Supplementary material
Source: PubMed Central journal article supplement (PMC7754074)
Supplement: jamapediatr-e205199-s001.pdf [file jamapediatr-e205199-s001.pdf]

## Supplementary Online Content

Tidblad A, Bottai M, Kieler H, Albertsson-Wikland K, Säwendahl L. Association of childhood growth hormone treatment with long-term cardiovascular morbidity. *JAMA Pediatr*. Published online December 21, 2020. doi:10.1001/jamapediatrics.2020.5199

**eMethods.** Study Population, Outcomes, and Analyses

**eTable 1.** ICD Codes Corresponding to Severe Diagnoses for Exclusion of Patients and Controls

**eTable 2.** List of ICD Codes for Cardiovascular Diseases and Number of Total Events for Each Category

**eTable 3.** Incidence Rate Ratios (IRRs) and Crude and Adjusted Hazard Ratios (HRs) for Overall and Severe CVD if rhGH Treatment Prescribed After 18 Years of Age in the Prescribed Drug Register (2005-2015)

**eTable 4.** Percentage Missing Values of Baseline Characteristics

**eTable 5.** Basal Characteristics for the Patients and Controls in the Sensitivity Analysis

**eTable 6.** Number of Events, Person-Years, Incidence Rate Ratios (IRRs), Crude and Adjusted Hazard Ratios (HRs) for Overall CVD and Severe CVD in the Sensitivity Analysis on a Subset of Patients and Controls

**eFigure.** Kaplan-Meier Curve of CVD Event-Free Probability in Patients vs Controls, Overall and Separated by Sex

**eReferences.**

This supplementary material has been provided by the authors to give readers additional information about their work.

## eMethods. Supplement methods

### Study population

The rhGH-treated population included all patients who had received at least one dose of rhGH before 18 years of age between January 1, 1985, and December 31, 2010. The patient data were collected from the Swedish National GH Register for Children and from clinical trials with rhGH between 1985-2010 with the following clinical trial numbers: TRN89-071, TRN88-080, TRN88-177, TRN89-070-01, TRN89-071-01, TRN98-0198-003, TRA6280-003, TRN151:142/01, and TRN2009/529-31. Informed consent was obtained for all participants in the National Growth Hormone Register for Children as well as for the clinical trials and ethical permission for the register and the studies have been approved by the appropriate Swedish ethics committees.<sup>1</sup> The coverage of the National GH Register is considered high, at an estimated approximately 85% based on an earlier evaluation.<sup>2</sup> Visits are registered 2-4 times a year through a specific protocol.

The total cohort consisted of 6,804 patients, and after the exclusions described below, the final cohort remaining in the analysis included 3,408 patients. The treatment indications of isolated growth hormone deficiency (GHD), small for gestational age (SGA) without catch-up growth, and idiopathic short stature (ISS) were selected to exclude more severe underlying diagnoses associated with rhGH treatment. These treatment indications correspond to the low-risk group defined in earlier publications including parts of our cohort.<sup>3</sup>

#### Exclusion criteria:

1. Treatment indication other than GHD, ISS, or SGA, thus belonging to risk groups 2 and 3 of previously published long-term follow-up studies within the SAGhE (Safety and Appropriateness of Growth Hormone Treatments in Europe) collaboration (n=2,888).<sup>3</sup>
2. Previous treatment with pituitary-derived GH (n=78).
3. Other hormonal treatment during the rhGH treatment period, indicating multiple pituitary hormonal deficiency (n=79).
4. Start of rhGH treatment after 18 years of age (n=4).
5. Other severe diagnoses in the Swedish National Patient Register (see eTable 1) or Swedish National GH Register indicating underlying conditions associated with increased risk of premature mortality or morbidity (n=346).
6. Other reasons (obviously incorrect starting date of rhGH in the register, n=1).

For each patient, 15 controls were randomly selected by Statistics Sweden (SCB) from the Swedish Total Population Register.<sup>4</sup> The selected controls were matched for sex, birth year and county, and alive at study start (date of rhGH treatment start). Thus, for the total cohort of 6,804 patients, a total of 102,060 controls were selected. The controls to the patients excluded above were also excluded (n=50,081), as well as controls with severe diagnoses in the Swedish National Patient Register (n=1,161), prescription of rhGH (n=20), or re-used personal identity number (n=22). A total of 50,036 controls remained in the analysis.

The classification of treatment indications followed the same criteria as those described by Albertsson-Wikland et al in a previous study of the same cohort of treated patients.<sup>1</sup> In summary, isolated GHD (n=1,837) was defined as having a GH peak level ( $\text{GH}_{\text{max}}$ )  $<10 \mu\text{g/L}$  on either provocation test (mainly Arginine-Insulin Tolerance Test) or during spontaneous 12h or 24h GH secretion profiles. Subgroup classification of  $\text{GH}_{\text{max}}$  from 0-4  $\mu\text{g/L}$  (n=485) or 5-9  $\mu\text{g/L}$  (n=1352) within the GHD group was also performed. The SGA group (n=672) consisted of treated patients born SGA (birth length and/or birth weight  $<-2$  SDS compared to the Swedish healthy newborn population reference)<sup>5</sup> and a having a  $\text{GH}_{\text{max}} \geq 10 \mu\text{g/L}$ . Hence, patients born SGA but with a  $\text{GH}_{\text{max}} <10 \mu\text{g/L}$  were only included in the GHD group. The ISS treatment indication (n=899) was defined as having a  $\text{GH}_{\text{max}} \geq 10 \mu\text{g/L}$  and *not* being SGA at birth.<sup>5</sup> If information on  $\text{GH}_{\text{max}}$  (n=691) or birth characteristics (n=285) were missing, the patient was categorized according to the diagnosis of the referring physician.

All treatment data (start of treatment, mean daily dose, duration of treatment, and cumulative dose) were gathered from the National GH registry and the clinical trials stated above. Information about rhGH treatment in adulthood was collected from the nationwide Prescribed Drug Register, which is updated automatically on a monthly basis and includes all prescribed drugs (ATC codes) in Sweden.<sup>6</sup>

The rhGH-treated patients had a mean age of 9.3 years at the start of rhGH treatment (1<sup>st</sup> percentile: 2.51 years, 99<sup>th</sup> percentile: 15.98 years), which equaled the age at study start, and a mean age of 16.35 years at the end of rhGH treatment (1<sup>st</sup> percentile: 6.59 years, 99<sup>th</sup> percentile: 20.03 years). The HRs of patients treated with rhGH after 18 years of age, based on information from the Prescribed Drug Registry (2005-2015), are presented in eTable 3. The mean follow-up time was 14.93 years (1<sup>st</sup> percentile: 2.24 years, 99<sup>th</sup> percentile: 25.00 years).

Linkage of individual information, for both patients and controls, from various healthcare and population-based registers was carried out through the individuals' unique personal identity numbers.<sup>7</sup>

### **Study outcome data**

Information on morbidity was gathered from the Swedish National Patient Register, which contains information on all in-patient care since 1963 (nationwide since 1987) and since 2001, also includes information on all outpatient visits to specialized caregivers (both public and private). The coverage of this register is very high, with an estimated drop-out rate of less than 1% in 2007.<sup>8</sup> Information on cause of death was gathered from the Swedish Cause of Death Register, which includes information on all deaths in Sweden since 1963. The coverage rate is over 99% of all deaths in Sweden and the register is updated annually. The dose-response analyses (duration of treatment, cumulative and mean dose) was performed with a lag-period of two years since the end of treatment to avoid the risk of reverse causality (protopathic bias) due to the potential association of treatment termination and the outcome or early manifestations of the outcome.

### **Independent variables**

The Swedish Medical Birth Register was used to collect background data regarding gestational age, birth weight, and birth length for both patients and controls and also to collect information about the mothers' height. The standard deviation scores (SDS) for birth length and birth weight were calculated from the current Swedish healthy population reference.<sup>5</sup> As described in Table 1, the patients were to a larger extent than the controls born prematurely and smaller at birth both regarding birth length and birth weight. All three birth characteristics, and the differences therein between the groups, were adjusted for in the Cox regression model that contained all the included covariates, used for our main analyses of overall CVD and severe CVD (Tables 3 and 4).

The Swedish Military Conscription Register includes measured height information of all young Swedish men and volunteering women who enroll for military service at approximately 19 years of age. The mandatory military service was gradually dismantled from mid-1990 and completely abolished in 2010. Information was gathered from the National Archives for data before 1997 and from the Swedish Defense Recruitment Agency for more recent data. Height data were also collected from the Swedish National Passport Registry, which is administered by the Swedish National Police Agency and includes height data for all individuals that issued a Swedish passport from 1991 and onwards. Height data are either stated or measured when applying for a passport.

To investigate the validity of height data from the Passport Register, we compared measured heights from the Conscription Register with height data in the Passport Register for individuals who had applied for a passport in the same year as their conscription (n=4,534). The results showed a very high correlation ( $r=0.98$ ), with a mean difference of only 0.6 cm (5<sup>th</sup> - 95<sup>th</sup> percentile: -1 to +3 cm) between the height values.

Statistics Sweden (SCB) has several population-based registries (Income and Taxation Register, The Swedish Register of Education, Multi-Generation Register and The Swedish Total Population Register) that were used to provide information on vital status, migration, and socioeconomic information such as total income and educational level.

To account for inflation and change in absolute income over the study period, total disposable income within the household at study inclusion was categorized in five income classes (quintiles) for each year, with income class = 1 the lowest quintile and income class = 5 the highest. The highest achievable education level for each parent to the patients or controls was coded in the register from 1 to 7, where 1 = primary school <9 years and 7 = postgraduate/doctoral studies. For each family, the highest educational level of either of the parents was included in the dataset.

The proportions of missing values within each baseline characteristic are presented in eTable 4. The possible interactions between patient status and all different independent variables were also checked without any significant interactions detected, including testing for interaction between patient status and sex ( $p=0.325$ , full model).

### **Estimation of the height at study entry for children in the control group**

Inclusion in the study for children in the patient group corresponded to the time when they started treatment. The control group included children who were of the same age as that of patients at the initiation of treatment. Therefore, the measure for height at study inclusion was available for children in the patient group but not for those in the control group. Because height was an important determinant of starting treatment, its value at the age of study inclusion of the controls was estimated. The estimation was based on all available height values measured on the controls at other time points.

The estimated value was the best linear unbiased predictor from a mixed-effects model. The analysis was conducted on the control children only and separately by sex. The mixed-effects model included age as the only predictor. Because the relationship between mean height and age was nonlinear, age was introduced in the model by means of natural cubic splines. The regression coefficients associated with the splines variables were considered fixed, not random, parameters. The splines knots were placed at -21, -18, -13, -6, -2, and 2 years. Some knots were at negative ages because age was centered at 20 years. The number and placement of the knots were determined to maximize the goodness of fit as measured by the likelihood. The fit was also evaluated visually through graphical representations.

An initial mixed-effects model was estimated separately for each sex. Along with the fixed coefficients for the age splines variables, the model included two random coefficients, one for the intercept and one for the linear slope. The two-by-two covariance matrix of the two random coefficients was left unstructured. The values of height with standardized residuals greater than 5 were considered outliers and were excluded from the subsequent analyses. After this exclusion, a second model was estimated, which included the same fixed and random effects as the first.

The fixed-effect coefficients for the age splines were all statistically significant. The variances of the random coefficients for the intercept and linear slope were significantly greater than zero.<sup>9</sup> The variance of the random effects for the remaining spline coefficients was not significant and these random coefficients were excluded from the models.

The value of height at study inclusion was calculated as the best linear unbiased predictor from the mixed models described above.<sup>10</sup>

### **Sensitivity analysis**

A sensitivity analysis was performed on a subset of the total cohort, in which only controls similar in height at study start were kept in the analysis. Of the 15 controls per patient, only those up to 5 cm taller than their corresponding patient at study start remained. Since the groups, as expected, differed a great deal on this variable, being one of the main reasons for considering growth hormone treatment, many controls were dropped from the analysis and subsequently only patients that had at least one control left were kept. In addition, patients and controls <-5 SDS in birth length and birth weight were excluded. Thus, the groups were in this analysis matched on height at study start and more similar in size at birth, in order to analyze if the point estimates for the hazard ratios (HRs) between the groups would differ or not compared with our main analyses.

The basal characteristics for this subset of patients and controls are summarized in eTable 5. The number of events, person-years, incidence rate ratios, crude and adjusted HRs for overall cardiovascular disease (CVD) and severe CVD are presented in eTable 6.

**eTable 1.** ICD Codes Corresponding to Severe Diagnoses for Exclusion of Patients and Controls

|                                                                                         | ICD-10   | ICD-9 <sup>†</sup> | ICD8       |
|-----------------------------------------------------------------------------------------|----------|--------------------|------------|
| Malignant neoplasms                                                                     | C00-99   | 140-209            | 140-209,99 |
| Cancer in situ                                                                          | D00-D099 | 230-234            | 140-209,99 |
| Benign pituitary tumour                                                                 | D35.2    | 227D               | 226,20     |
| Neoplasms of uncertain or unknown behaviour                                             | D37-48   | 235-239            | 230-239    |
| Haemolytic anaemias                                                                     | D55-59   | 282                | 282        |
| Anaemia due to enzyme disorders                                                         | D55      | .                  | .          |
| Thalassemia <sup>†</sup>                                                                | D56      | 282E               | 282.4      |
| Sickle-cell anaemia <sup>‡</sup>                                                        | D57      | 282G               | .          |
| Other hereditary haemolytic anaemias                                                    | D58      | 282                | 282        |
| Acquired haemolytic anaemias                                                            | D59      | 282                | 282        |
| Aplastic and other anaemias                                                             | D60-64   | 284                | 284        |
| Acquired pure red cell aplasia                                                          | D60      | 284W               | 284        |
| Other aplastic anaemias                                                                 | D61.0    | 284A               | 284        |
| Other specified diseases with lymphoreticular and reticulohistiocytic tissue (e.g. HLH) | D76.1    | .                  | .          |
| SCID                                                                                    | D81.0-2  | 279L               | .          |
| Diabetes Mellitus                                                                       | E10-14   | 250                | 250        |
| Hyperfunction of pituitary gland                                                        | E22,0    | 253A, 253B         | 253,00-01  |
| Cushing syndrome                                                                        | E24,0    | 255A               | 258,00     |
| Disorders of aromatic amino acids                                                       | E70      | 270                | 270        |
| Disorders of branched-chain amino-acids                                                 | E71      | 270                | 270        |
| Other disorders of amino-acid metabolism                                                | E72      | 270                | 270        |
| Other disorders of carbohydrate metabolism <sup>§</sup>                                 | E74      | 271                | 271        |
| Disorders of sphingolipid metabolism and other lipid storage disorders                  | E75      | 272, 330A,330B     | 272        |
| Disorders of glycosaminoglycan metabolism                                               | E76      | 277F               | .          |
| Disorders of glycoprotein metabolism                                                    | E77      | 272H               | .          |

|                                                                                                                                   | ICD-10  | ICD-9*         | ICD8           |
|-----------------------------------------------------------------------------------------------------------------------------------|---------|----------------|----------------|
| Disorders of lipoprotein metabolism and other lipidemias, purine and pyrimidine metabolism and porphyrin and bilirubin metabolism | E78-83  | 272, 277       | 279            |
| Cystic fibrosis <sup>  </sup>                                                                                                     | E84     | 277A           | 273            |
| Amyloidosis                                                                                                                       | E85     | 277D           | 276.99         |
|                                                                                                                                   |         |                |                |
| Crohn's disease                                                                                                                   | K50     | 555            | 563            |
| Ulcerative colitis                                                                                                                | K51     | 556            | 563            |
| Liver diseases                                                                                                                    | K70-74  | 571            | 571            |
|                                                                                                                                   |         |                |                |
| Juvenile rheumatic arthritis                                                                                                      | M08     | 714            | 712            |
|                                                                                                                                   |         |                |                |
| Chronic kidney disease & Unspecified kidney failure                                                                               | N18     | 585            | 582,00         |
|                                                                                                                                   |         |                |                |
| Congenital malformations of the nervous system                                                                                    | Q00-07  | 740-742        | 740-743        |
| Cardiovascular malformations <sup>†</sup>                                                                                         | Q20-28  | 745-747        | 746-747        |
| Thanatophoric short stature <sup>  </sup>                                                                                         | Q77.1   | 756E           | .              |
| Achondroplasia <sup>  </sup>                                                                                                      | Q77.4   | 756E           | "756,40"       |
| OI, McCune-Albright, Osteopetrosis, etc. <sup>  </sup>                                                                            | Q78.0-3 | 756F           | 756,50, 756,60 |
| NF, Tuberous sclerosis, etc. <sup>  </sup>                                                                                        | Q85.0-9 | 237H           | 743,40,        |
| Other malformations of face (Rubinstein, Marfan, etc.) <sup>  </sup>                                                              | Q87     | 758A-X, 759F/G | 759,30-99      |
| Chromosomal anomalies <sup>  </sup> <sup>◊</sup>                                                                                  | Q90-99  | 758A-X, 759F/G | 759,30-99      |
| Status post-transplantation (bone marrow, stem cells, etc.)                                                                       | Z94.8   | .              | .              |

\* The Swedish version of ICD-9 is alphanumeric with the fourth and fifth digit replaced by a letter (A=0, B=1, C=2, D=3, E=4, F=5, G=6, H=7, W=8, X=9). This was done in the adoption of ICD-9 in order to more easily distinguish between earlier similar coding in ICD-8.

<sup>†</sup> Exception: Thalassemia trait (D56.3, 282E).

<sup>‡</sup> Exception: Sickle-cell trait (D57.3, 282F).

<sup>§</sup> Exception: Lactase deficiency, renal glukosuria, unspecified cause (E74.8-9, 270X,271D/E/W, 270/271.88/99).

<sup>||</sup> Exclusion diagnosis independent of received before or after study start.

<sup>††</sup> Exception: Patent ductus arteriosus (Q25.0, 747A, 747,09).

<sup>◊</sup> Exception: Healthy individuals with balanced translocations or inversions (Q95.0-1).

**eTable 2.** List of *ICD* Codes for Cardiovascular Diseases and Number of Total Events for Each Category

| Cardiovascular diagnose                                     | ICD-8                                      | ICD-9                    | ICD-10                       | Patient cohort<br>(n=3,408)<br>n (%) | Control cohort<br>(n=50,036)<br>n (%) | <i>p</i> value* |
|-------------------------------------------------------------|--------------------------------------------|--------------------------|------------------------------|--------------------------------------|---------------------------------------|-----------------|
| Hypertensive disease                                        | 400,00-405,99                              | 400-405X                 | I10.0-I15.9                  | 14 (0.41)                            | 199 (0.40)                            | 0.89            |
| Ischemic heart disease†                                     | 410,00-414,99                              | 410-414X                 | I20.0-I25.9                  | 5 (0.15)                             | 18 (0.04)                             | 0,01            |
| Pulmonary heart disease                                     | 426,01-02, 426,08-09                       | 415-417X                 | I26.0-I28.9                  | 2 (0.06)                             | 48 (0.10)                             | 0.77            |
| Aneurysm of pulmonary artery†                               | .                                          | 417B                     | I28.1                        | 0                                    | 0                                     | .               |
| Valvular heart disease                                      | 424,00-424,99                              | 424A-424X                | I34.0-I37.9                  | 7 (0.21)                             | 52 (0.10)                             | 0.10            |
| Cardiomyopathy†                                             | 425,00, 425,08-09                          | 425A-E, 425W-X           | I42.0-2, 4-5, I42.7-9        | 5 (0.15)                             | 19 (0.04)                             | 0,02            |
| Arrhythmia                                                  | 427,20, 427,27-29,<br>427,90-92, 427,98-99 | 426A-X                   | I44.0-49.9                   | 32 (0.94)                            | 445 (0.89)                            | 0.71            |
| Heart failure†                                              | 427,00-10, 428,99                          | 428A-X                   | I50.0-9                      | 4 (0.12)                             | 21 (0.04)                             | 0.07            |
| Subarachnoid bleeding†                                      | 430,00-99                                  | 430                      | I60.0-9                      | 1 (0.03)                             | 17 (0.03)                             | 1.00            |
| Intracerebral bleeding†                                     | 431,00, 431,90                             | 431                      | I61.0-9                      | 0                                    | 15 (0.03)                             | 0.62            |
| Other or unspecified (non-traumatic) intracranial bleeding† | 431,01, 431,08-09,<br>431,91, 431,98-99    | 432, 432A, 432B,<br>432X | I62.0-9                      | 1 (0.03)                             | 3 (0.01)                              | 0.23            |
| Cerebral infarction†                                        | 432-434                                    | 433-434                  | I63.0-I63.9                  | 3 (0.09)                             | 28 (0.06)                             | 0.45            |
| Unspecified stroke†                                         | 436-437                                    | 436-437                  | I64.0-9                      | 1 (0.03)                             | 4 (0.01)                              | 0.28            |
| Transient cerebral ischemia†                                | 435-436                                    | 435-436                  | G45.0-9                      | 2 (0.06)                             | 11 (0.02)                             | 0.20            |
| Other cerebrovascular disease†                              | 438,00-99                                  | 437-437X                 | I65.0-I67.9                  | 1 (0.03)                             | 17 (0.03)                             | 1.00            |
| Late effects of cerebrovascular disease†                    | .                                          | 438A-X                   | I69.0-I69.9                  | 3 (0.09)                             | 27 (0.05)                             | 0.44            |
| Atherosclerosis                                             | 440                                        | 440                      | I70.0-I70.9                  | 0                                    | 11 (0.02)                             | 1.00            |
| Aneurysm†                                                   | 441-442                                    | 441-442                  | I71.0-I72.9                  | 3 (0.09)                             | 12 (0.02)                             | 0.07            |
| Claudicatio intermittens                                    | 443.9                                      | 443X                     | I73.9                        | 0                                    | 8 (0.02)                              | 1.00            |
| Emboli and thrombosis in arteries                           | 444                                        | 444                      | I74.0-I74.9                  | 0                                    | 11 (0.02)                             | 1.00            |
| Other diseases of circulatory system                        | 443,00-80, 443,99                          | 443A-W, 445-449          | I73.0-I73.9, I77.0-<br>I99.9 | 78 (2.30)                            | 977 (1.96)                            | 0.18            |

\* Comparison between patients and controls with Fischer exact test.

† These diagnoses are included in the subgroup of "Severe CVD" diagnoses.

**eTable 3.** Incidence Rate Ratios (IRRs) and Crude and Adjusted Hazard Ratios (HRs) for Overall and Severe CVD if rhGH Treatment Prescribed After 18 Years of Age in the Prescribed Drug Register (2005-2015)

|                      | Events (n) | Pyrs    | IRR [95% CI]      | Crude HR [95% CI] | p-value | Adjusted HR [95% CI], restricted model <sup>†</sup> | p-value | Adjusted HR [95% CI], full model <sup>‡</sup> | p-value |
|----------------------|------------|---------|-------------------|-------------------|---------|-----------------------------------------------------|---------|-----------------------------------------------|---------|
| <b>Overall CVD</b>   |            |         |                   |                   |         |                                                     |         |                                               |         |
| Controls* (n=40,229) | 1,590      | 678,329 | 1.00 (Ref)        | 1.00 (Ref)        |         | 1.00 (Ref)                                          |         | 1.00 (Ref)                                    |         |
| Patients (n=174)     | 16         | 2567    | 2.66 [1.52-4.33]  | 2.88 [1.76-4.72]  | <0.001  | 4.60 [2.71-7.84]                                    | <0.001  | 5.14 [2.94-8.98]                              | <0.001  |
| <b>Severe CVD</b>    |            |         |                   |                   |         |                                                     |         |                                               |         |
| Controls* (n=40,229) | 148        | 688,985 | 1.00 (Ref)        | 1.00 (Ref)        |         | 1.00 (Ref)                                          |         | 1.00 (Ref)                                    |         |
| Patients (n=174)     | 4          | 2644    | 7.04 [1.89-18.42] | 7.80 [2.87-21.18] | <0.001  | 8.04 [2.44-26.46]                                   | 0.001   | 12.49 [3.64-42.92]                            | <0.001  |

\* Only controls with same age range (17-45 years) kept as comparison group to exclude difference of age range between the patients and controls.

<sup>†</sup> Restricted model adjusted only for age at start, height at start and sex.

<sup>‡</sup> Full model adjusted for gestational age, birth length, birth weight, age at start, height at start, parental educational level, family income and sex.



| <b>eTable 4. Percentage Missing Values of Baseline Characteristics</b> |                              |                               |
|------------------------------------------------------------------------|------------------------------|-------------------------------|
|                                                                        | <b>Patients</b><br>(n=3,408) | <b>Controls</b><br>(n=50,036) |
| <b>Sex</b>                                                             |                              |                               |
| Missing, n (%)                                                         | 0 (0)                        | 0 (0)                         |
| <b>Gestational age</b>                                                 |                              |                               |
| Missing, n (%)                                                         | 276 (8.1)                    | 4,622 (9.2)                   |
| <b>Birth length</b>                                                    |                              |                               |
| Missing, n (%)                                                         | 294 (8.6)                    | 5,072 (10.1)                  |
| <b>Birth weight</b>                                                    |                              |                               |
| Missing, n (%)                                                         | 198 (5.8)                    | 4,702 (9.4)                   |
| <b>Age at start</b>                                                    |                              |                               |
| Missing, n (%)                                                         | 0 (0)                        | 0 (0)                         |
| <b>Height at start</b>                                                 |                              |                               |
| Missing, n (%)                                                         | 180 (5.3)                    | 2,257 (4.5)                   |
| <b>Family income level</b>                                             |                              |                               |
| Missing, n (%)                                                         | 12 (0.4)                     | 251 (0.5)                     |
| <b>Parental educational level</b>                                      |                              |                               |
| Missing, n (%)                                                         | 2 (0.1)                      | 154 (0.3)                     |

**eTable 5.** Basal Characteristics for the Patients and Controls in the Sensitivity Analysis

|                                   | <b>Patients</b><br>(n=837) | <b>Controls</b><br>(n=1,695) |
|-----------------------------------|----------------------------|------------------------------|
| <b>Sex</b>                        |                            |                              |
| Males, n (%)                      | 583 (69.7)                 | 1,131 (66.7)                 |
| Females, n (%)                    | 254 (30.3)                 | 564 (33.3)                   |
| <b>Gestational age (week)</b>     |                            |                              |
| Mean (SD)                         | 38.5 (3.0)                 | 39.1 (2.2)                   |
| <b>Birth length (SDS)</b>         |                            |                              |
| Mean (SD)                         | -1.30 (1.4)                | -0.90 (1.3)                  |
| <b>Birth weight (SDS)</b>         |                            |                              |
| Mean (SD)                         | -0.81 (1.3)                | -0.52 (1.1)                  |
| <b>Age at start (years)</b>       |                            |                              |
| Mean (SD)                         | 7.94 (2.99)                | 7.60 (3.26)                  |
| <b>Height at start (cm)</b>       |                            |                              |
| Mean (SD)                         | 115.6 (17.5)               | 118.3 (19.7)                 |
| <b>Family income level</b>        |                            |                              |
| Mean (SD)                         | 3.2 (1.4)                  | 2.8 (1.4)                    |
| <b>Parental educational level</b> |                            |                              |
| Mean (SD)                         | 4.7 (1.4)                  | 4.4 (1.4)                    |

**eTable 6.** Number of events, person-years (pyrs), incidence rate ratios (IRRs), crude and adjusted hazard ratios (HRs) for overall CVD and severe CVD in the sensitivity analysis on a subset of patients and controls

|                    | Events (n) | Pyrs   | IRR [95% CI]      | Crude HR [95% CI] | p-value | Adjusted HR [95% CI], restricted model <sup>*</sup> | p-value | Adjusted HR [95% CI], full model <sup>†</sup> | p-value |
|--------------------|------------|--------|-------------------|-------------------|---------|-----------------------------------------------------|---------|-----------------------------------------------|---------|
| <b>Overall CVD</b> |            |        |                   |                   |         |                                                     |         |                                               |         |
| Controls (n=1,695) | 44         | 24,498 | 1.00 (Ref)        | 1.00 (Ref)        |         | 1.00 (Ref)                                          |         | 1.00 (Ref)                                    |         |
| Patients (n=837)   | 36         | 12,042 | 1.66 [1.04-2.65]  | 1.66 [1.07-2.58]  | 0.024   | 1.42 [0.88-2.31]                                    | 0.154   | 1.56 [0.89-2.71]                              | 0.119   |
| <b>Severe CVD</b>  |            |        |                   |                   |         |                                                     |         |                                               |         |
| Controls (n=1,695) | 5          | 24,771 | 1.00 (Ref)        | 1.00 (Ref)        |         | 1.00 (Ref)                                          |         | 1.00 (Ref)                                    |         |
| Patients (n=837)   | 8          | 12,291 | 3.22 [0.93-12.53] | 3.21 [1.04-9.95]  | 0.043   | 2.13 [0.67-6.81]                                    | 0.201   | 4.33 [0.81-23.25]                             | 0.087   |

<sup>\*</sup> Restricted model adjusted only for age at start, height at start and sex.

<sup>†</sup> Full model adjusted for gestational age, birth length, birth weight, age at start, height at start, parental educational level, family income and sex.

**eFigure.** Kaplan-Meier Curve of CVD Event-Free Probability in Patients vs Controls, Overall and Separated by Sex

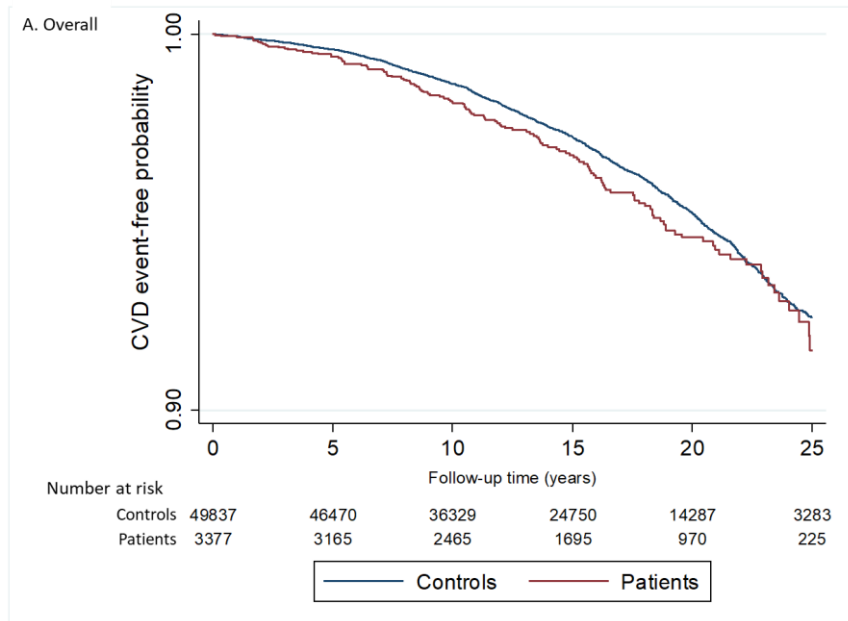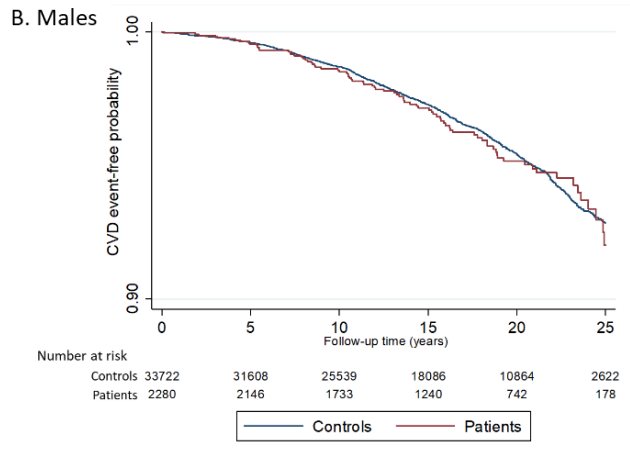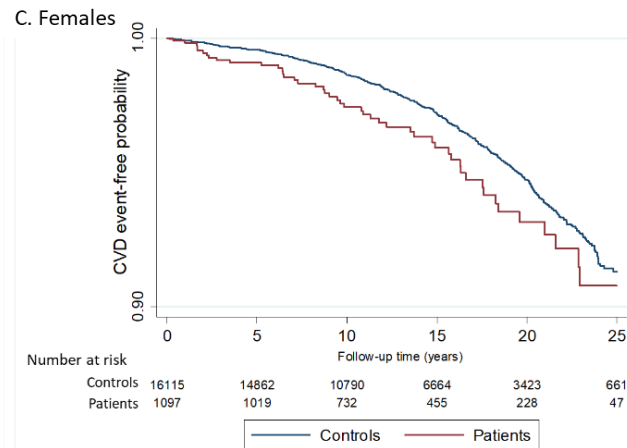

## eReferences

1. Albertsson-Wikland K, Martensson A, Savendahl L, et al. Mortality Is Not Increased in Recombinant Human Growth Hormone-treated Patients When Adjusting for Birth Characteristics. *The Journal of clinical endocrinology and metabolism* 2016; **101**(5): 2149-59.
2. (GPGRC) GPGRC. The Swedish National Growth Hormone Register for Children. <http://gpgrc.gu.se/nat-gh-reg> (accessed 19th of December 2019).
3. Swerdlow AJ, Cooke R, Albertsson-Wikland K, et al. Description of the SAGhE Cohort: A Large European Study of Mortality and Cancer Incidence Risks after Childhood Treatment with Recombinant Growth Hormone. *Hormone research in paediatrics* 2015; **84**(3): 172-83.
4. Ludvigsson JF, Almqvist C, Bonamy AE, et al. Registers of the Swedish total population and their use in medical research. *European journal of epidemiology* 2016.
5. Niklasson A, Albertsson-Wikland K. Continuous growth reference from 24th week of gestation to 24 months by gender. *BMC pediatrics* 2008; **8**: 8.
6. Wettermark B, Hammar N, Fored CM, et al. The new Swedish Prescribed Drug Register--opportunities for pharmacoepidemiological research and experience from the first six months. *Pharmacoepidemiology and drug safety* 2007; **16**(7): 726-35.
7. Ludvigsson JF, Otterblad-Olausson P, Pettersson BU, Ekblom A. The Swedish personal identity number: possibilities and pitfalls in healthcare and medical research. *European journal of epidemiology* 2009; **24**(11): 659-67.
8. Welfare TSNBoHa. The National Patient Register. <https://www.socialstyrelsen.se/en/statistics-and-data/registers/register-information/the-national-patient-register/> (accessed 19th of December 2019).
9. Self SG, Liang K-Y. Asymptotic Properties of Maximum Likelihood Estimators and Likelihood Ratio Tests Under Nonstandard Conditions. *Journal of the American Statistical Association* 1987; **82**(398): 605-10.
10. Bates DM PJ. Computational Methods for Multilevel Modelling. Technical Memorandum BL0112140-980226-01TM Murray Hill, NJ: Bell Labs, Lucent Technologies.; 1998.
